# Supplementary material
Source: MDPI journal article supplement (https://www.mdpi.com/2073-4344/11/1/23)
Supplement: s1 [file s1]

# Supplementary Information for F. Sakina et al

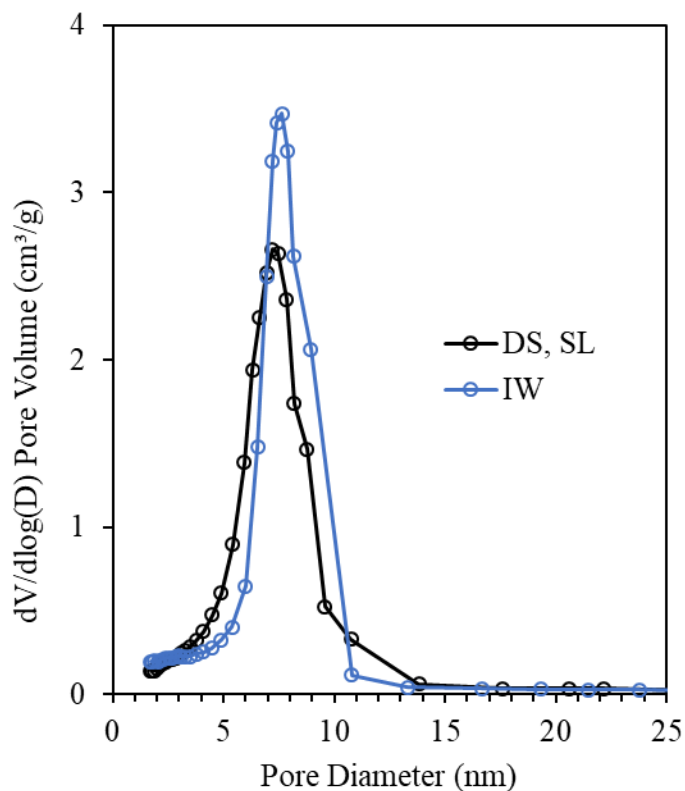

**Figure S1.** Pore size distributions for OMC templates used to prepare Pd/OMC catalysts as indicated.

**Table S1.** Nitrogen physisorption data of the OMC templates used to prepare the IW-Pd, DS-Pd and SL-Pd catalysts.

| template                   | SSA<br>(m <sup>2</sup> /g) | V <sub>P</sub><br>(cm <sup>3</sup> /g) | V <sub>micro</sub><br>(cm <sup>3</sup> /g) | D <sub>p</sub><br>(nm) |
|----------------------------|----------------------------|----------------------------------------|--------------------------------------------|------------------------|
| Template for IW-Pd         | 589                        | 0.58                                   | 0.055                                      | 7.6                    |
| Template for DS-Pd & SL-Pd | 611                        | 0.64                                   | 0.053                                      | 7.2                    |

SSA: Specific surface area; V<sub>P</sub>: Pore volume; V<sub>micro</sub>: Micropore volume; D<sub>p</sub>: Pore diameter

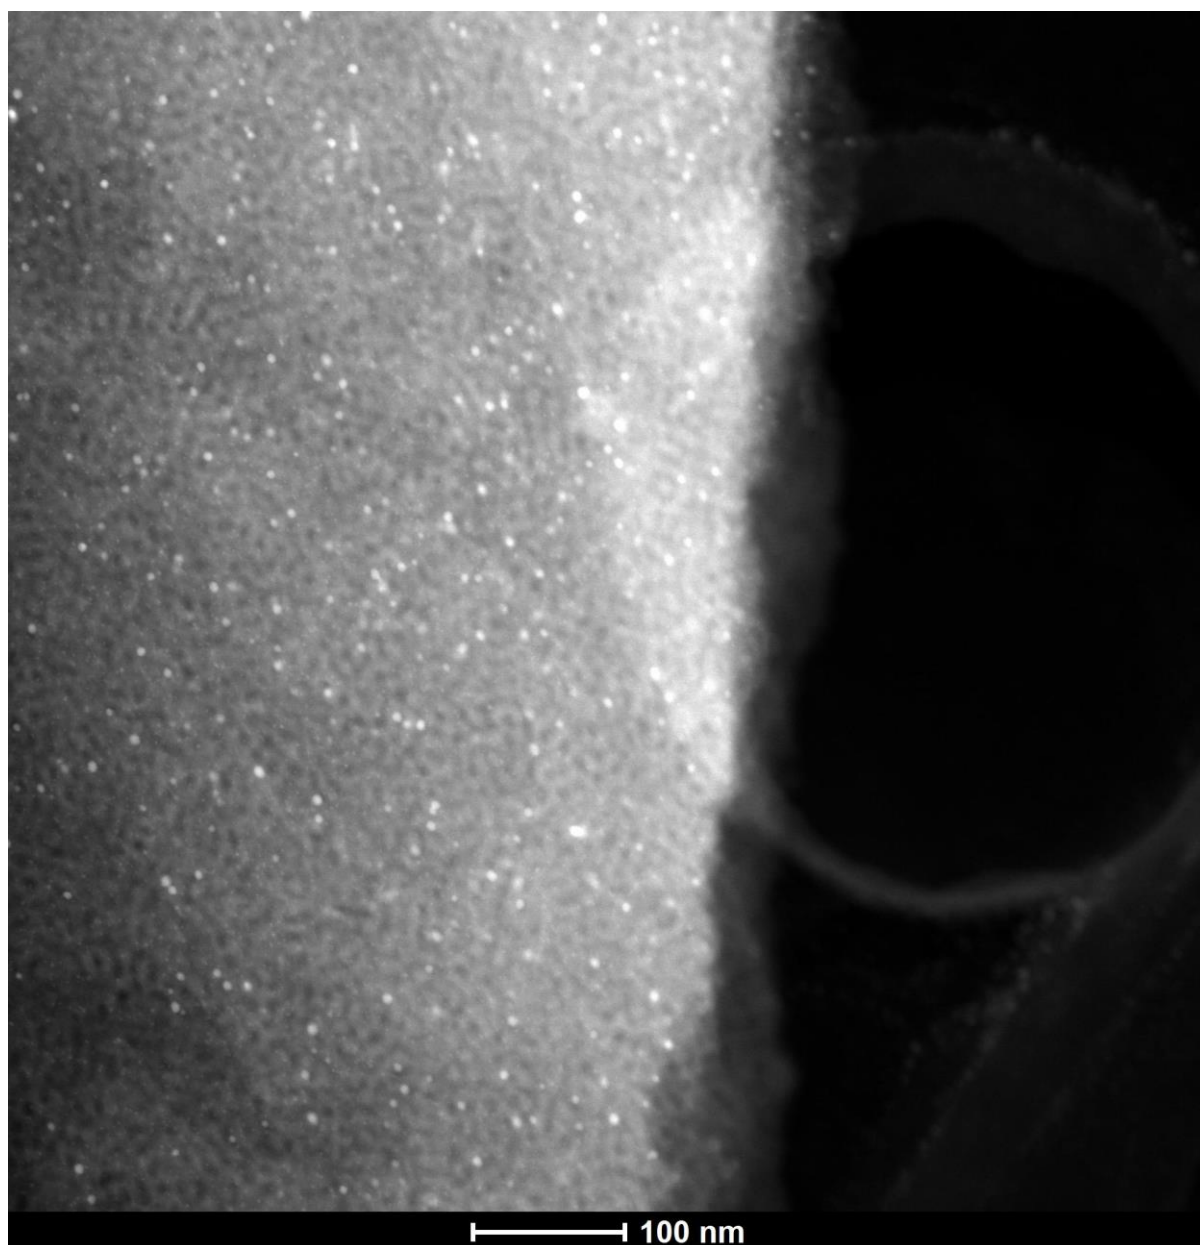

**Figure S2.** Additional HAADF image of the catalyst IW-Pd in which the position of the intermediate particles predominantly in the mesopores can be seen.
